# Supplementary material
Source: publisher figshare collection journal article supplement (https://sage.figshare.com/ndownloader/files/17636516)
Supplement: Supplementary file 1 [file 17636516]

#### Supplement 4. Risk of bias assessment\*

| Study ID<br>(first author,<br>year) | Sequence generation | Allocation concealment | Blinding of participants | Blinding of outcome assessor | Incomplete outcome data | Selective outcome reporting | Other bias |
|-------------------------------------|---------------------|------------------------|--------------------------|------------------------------|-------------------------|-----------------------------|------------|
| Avis 2008 <sup>20</sup>             | L                   | L                      | L                        | L                            | H                       | L                           | L          |
| Avis 2016 <sup>21</sup>             | L                   | L                      | L                        | L                            | H                       | L                           | L          |
| Ee 2016 <sup>22</sup>               | L                   | L                      | L                        | L                            | L                       | L                           | L          |
| Huang 2016 <sup>23</sup>            | L                   | L                      | L                        | L                            | U                       | L                           | L          |
| Kim 2007 <sup>24</sup>              | L                   | U                      | L                        | U                            | L                       | L                           | L          |
| Kim 2011 <sup>25</sup>              | L                   | U                      | L                        | L                            | L                       | L                           | L          |
| Nir 2007 <sup>26</sup>              | L                   | U                      | L                        | L                            | H                       | L                           | H          |
| Painovich 2012 <sup>27</sup>        | L                   | U                      | L                        | U                            | L                       | L                           | L          |

\*Cochrane Risk of Bias Tool for Randomized Controlled Trials: H – High risk of bias; L - Low risk of bias; U – Unclear risk of bias
